# Supplementary material
Source: HighWire-hosted journal article supplement (https://erj.ersjournals.com/content/59/5/2101142)

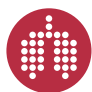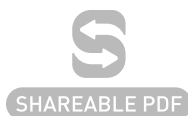

# Use of Singing for Lung Health as an alternative training modality within pulmonary rehabilitation for COPD: a randomised controlled trial

Mette Kaasgaard <sup>1,2</sup>, Daniel Bech Rasmussen <sup>1,3</sup>, Karen Hjerrild Andreasson <sup>1,3,4</sup>, Ole Hilberg <sup>3,5</sup>, Anders Løkke <sup>5</sup>, Peter Vuust <sup>2</sup> and Uffe Bodtger <sup>1,3,6</sup>

<sup>1</sup>Pulmonary Research Unit Region Zealand (PLUZ), Dept of Respiratory Medicine, Zealand University Hospital, Naestved, Denmark. <sup>2</sup>Dept of Clinical Medicine, Center for Music in the Brain, Aarhus University, Denmark and the Royal Academy of Music, Aarhus/Aalborg, Denmark. <sup>3</sup>Dept of Regional Health Research, University of Southern Denmark, Odense, Denmark. <sup>4</sup>Dept of Physiotherapy and Occupational Therapy, Naestved-Slagelse-Ringsted Hospitals, Naestved, Denmark. <sup>5</sup>Dept of Respiratory Medicine, Lillebaelt Hospital, Vejle, Denmark. <sup>6</sup>Dept of Internal Medicine, Zealand University Hospital Roskilde, Roskilde, Denmark.

Corresponding author: Mette Kaasgaard ([mk@clin.au.dk](mailto:mk@clin.au.dk))

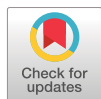

Shareable abstract (@ERSpublications)

**Singing for Lung Health was non-inferior to physical exercise training in short-term improvement of 6-min walk test distance in COPD patients attending pulmonary rehabilitation. In both groups, the effect was related to high adherence.** <https://bit.ly/3uoP4Q8>

**Cite this article as:** Kaasgaard M, Rasmussen DB, Andreasson KH, *et al.* Use of Singing for Lung Health as an alternative training modality within pulmonary rehabilitation for COPD: a randomised controlled trial. *Eur Respir J* 2022; 59: 2101142 [DOI: 10.1183/13993003.01142-2021].

This single-page version can be shared freely online.

Copyright ©The authors 2022.

This version is distributed under the terms of the Creative Commons Attribution Non-Commercial Licence 4.0. For commercial reproduction rights and permissions contact [permissions@ersnet.org](mailto:permissions@ersnet.org)

This article has an editorial commentary:  
<https://doi.org/10.1183/13993003.02961-2021>

Received: 21 April 2021  
Accepted: 22 Sept 2021

## Abstract

**Background** Pulmonary rehabilitation (PR) is a cornerstone in chronic obstructive pulmonary disease (COPD) management. However, PR adherence is generally low, and barriers include availability, economic issues, motivation and an inability to attend or perform physical training. Therefore, alternative, evidence-based PR activities are required. Singing may have benefits for quality of life (QoL), respiratory control and well-being in COPD, but the impact on the PR key outcome, physical exercise capacity, is uncertain.

**Methods** In this randomised controlled trial (NCT03280355), we investigated the effectiveness of 10 weeks of PR, including either “Singing for Lung Health” (SLH) training or standard physical exercise training (PExT). The primary outcome was a change in exercise capacity (6-min walk distance (6MWD)) from baseline to post-PR. Secondary outcomes were changes in QoL (St George’s Respiratory Questionnaire (SGRQ)), Hospital Anxiety and Depression Score (HADS), lung function, dyspnoea and adherence.

**Results** We included 270 COPD patients, and 195 completed the study. Demographics across groups were comparable, and both groups improved significantly in 6MWD and SGRQ score. SLH was non-inferior to PExT in improving 6MWD (mean±SD 13.1±36.3 m versus 14.1±32.3 m,  $p=0.81$ ; difference 1.0 m, 95% CI −7.3–9.3 m) with 21.8% and 25.0%, respectively ( $p=0.57$ ), reaching the 6MWD minimal important difference of 30 m. We found no significant between-group differences concerning SGRQ, HADS, lung function, dyspnoea or adherence.

**Conclusion** Our study suggests that SLH is non-inferior to PExT in improving 6MWD during a 10-week PR programme. Future studies addressing reproducibility, long-term effects and health economics are needed.

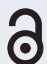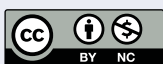

Supplement: inline-supplementary-material-2 [file inline-supplementary-material-2.pdf]
